# Supplementary material
Source: Royal Society of Chemistry journal article supplement (doi:10.1039/d6tc00258g)
Supplement: d6tc00258g1.pdf [file d6tc00258g1.pdf]

## Supporting Information

# Dual-Functional Cr<sup>3+</sup>-doped Far-Red to NIR Broadband Phosphors Enabling High-Fidelity White Lighting and Non-Destructive Detection

Zhenwei Jia,<sup>a</sup> Jingyi Gao,<sup>a</sup> Xiaohui Zhao,<sup>a</sup> Mengdi Yue,<sup>a</sup> Li Wu,<sup>a\*</sup> Yongfa Kong<sup>a</sup> and Jingjun Xu<sup>a</sup>

<sup>a</sup> Key Laboratory of Weak-Light Nonlinear Photonics, Ministry of Education, School of Physics, Nankai University, Tianjin 300071, China.

\* E-mail: lwu@nankai.edu.cn

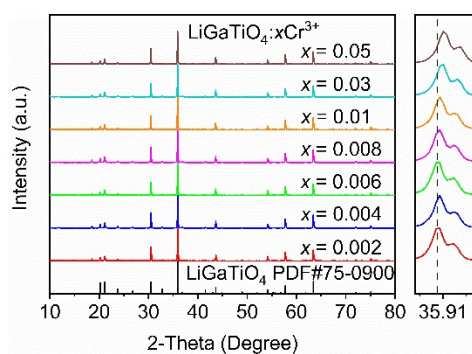

Fig. S1. XRD patterns of LGT:xCr<sup>3+</sup> ( $x = 0.002, 0.004, 0.006, 0.008, 0.01, 0.03, 0.05$ ).

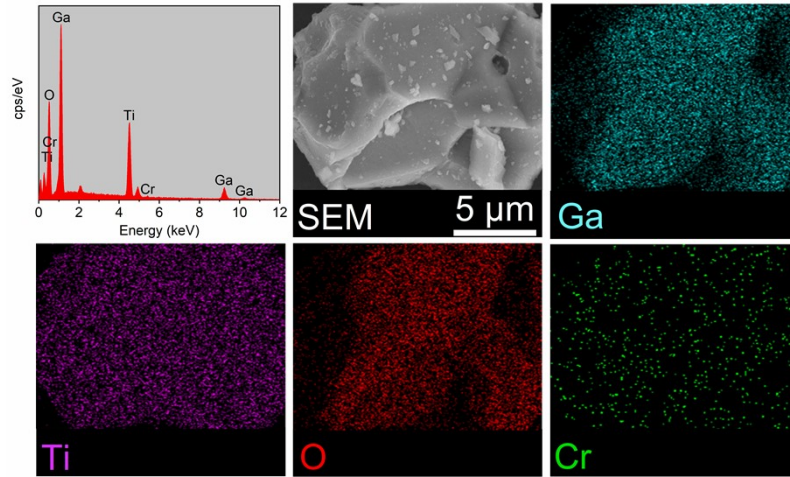

Fig. S2. SEM, EDS and elemental mapping of LGT:0.008Cr<sup>3+</sup>.

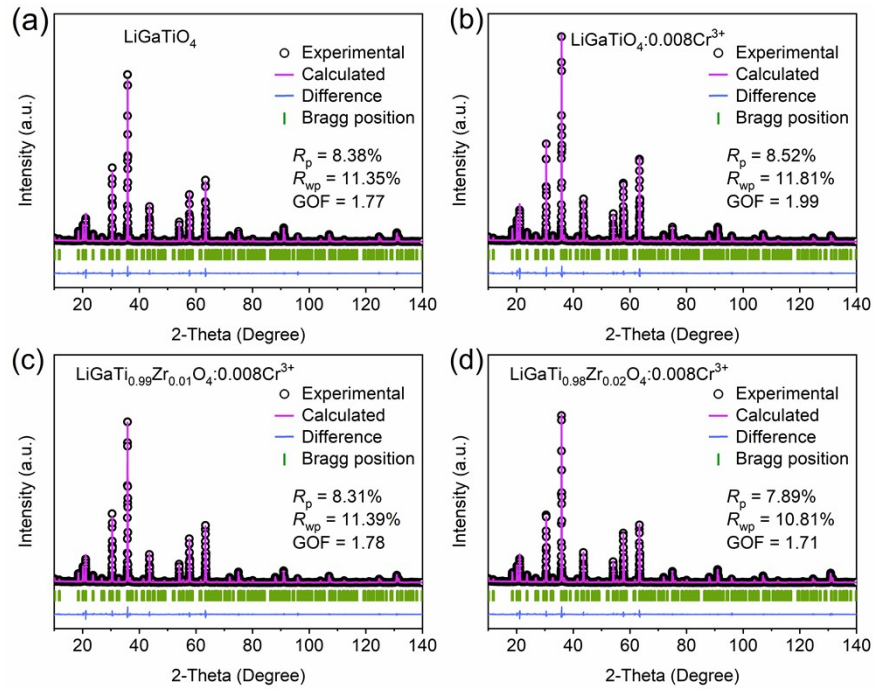

Fig. S3. Rietveld refinement results of (a) LGT, (b) LGT:0.008Cr<sup>3+</sup>, (c)  $\text{LiGaTi}_{0.99}\text{Zr}_{0.01}\text{O}_4:0.008\text{Cr}^{3+}$  and (d)  $\text{LiGaTi}_{0.98}\text{Zr}_{0.02}\text{O}_4:0.008\text{Cr}^{3+}$ .

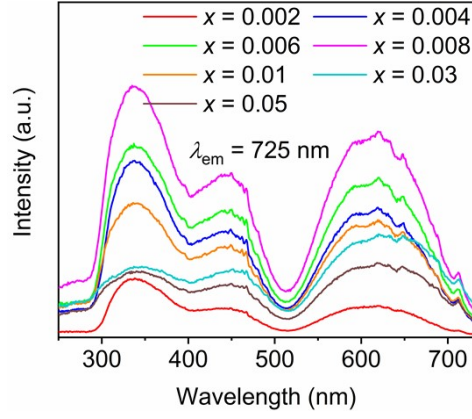

Fig. S4. PLE spectra of LGT: $x\text{Cr}^{3+}$  ( $x = 0.002, 0.004, 0.006, 0.008, 0.01, 0.03, 0.05$ ).

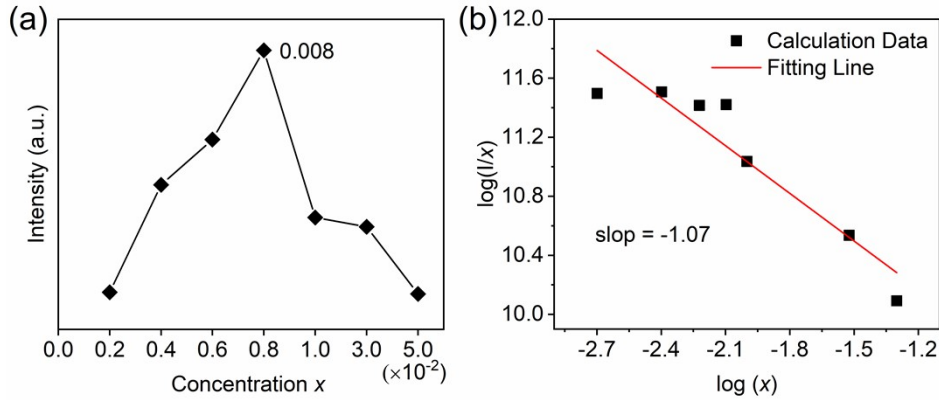

Fig. S5. (a) The relative intensity of LGT: $x\text{Cr}^{3+}$  ( $x = 0.002, 0.004, 0.006, 0.008, 0.01, 0.03, 0.05$ ). (b) The fitting results between  $\log(I/x)$  and  $\log(x)$ .

$$R_c = 2 \left( \frac{3V}{4\pi X_c N} \right)^{\frac{1}{3}}$$

The critical energy transfer distance  $R_c$  was calculated from the equation  $R_c = 2 \left( \frac{3V}{4\pi X_c N} \right)^{\frac{1}{3}}$ , where  $V$  is the cell volume,  $X_c$  is the critical concentration of  $\text{Cr}^{3+}$ , and  $N$  is the cation number that  $\text{Cr}^{3+}$  could occupy in per unit cell. For LGT: $x\text{Cr}^{3+}$ ,  $V = 856.74 \text{ \AA}^3$ ,  $N = 16$ ,  $X_c = 0.008$ , and the  $R_c$  value is determined to be  $23.4 \text{ \AA}$ . The calculation result is greater than  $5 \text{ \AA}$ , which means that the multipolar interactions lead to concentration quenching in LGT: $x\text{Cr}^{3+}$ . The mechanism of multipolar

interactions between  $\text{Cr}^{3+}$  ions can be further explained using the formula  $\frac{1}{x} = k \left[ 1 + \beta(x)^3 \right]^{-1}$ , where  $I$  is the emission intensity of the sample,  $x$  is the concentration of  $\text{Cr}^{3+}$  ion,  $k$  and  $\beta$  are constants. The value of  $\theta$  is 3 corresponds to the energy transfer among the nearest-neighbor ions, while 6, 8 and 10 corresponds to dipole–dipole, dipole–quadrupole and quadrupole–quadrupole interactions, respectively. Fig S4 shows the relation between  $\log(I/x)$  and  $\log(x)$ , and the value is equals to 3.21, which is close to 3. Therefore, the main concentration quenching mechanism for LGT: $x\text{Cr}^{3+}$  is the energy transfer among the nearest-neighbor ions.

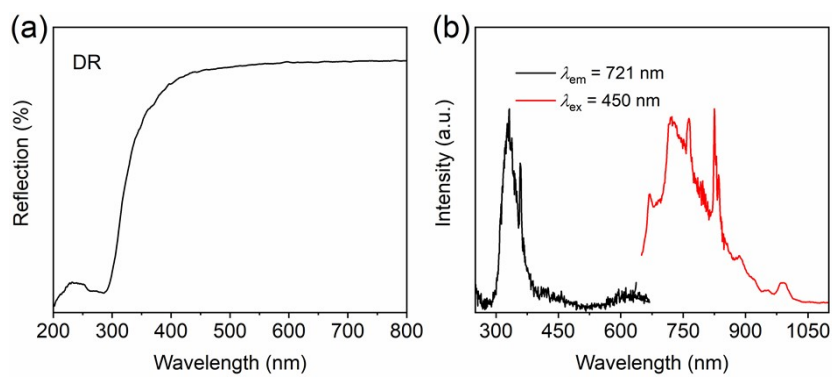

Fig. S6. Fitting results of the fluorescence decay curve for LGT:0.008Cr<sup>3+</sup> phosphors, monitoring 725 nm at room temperature.

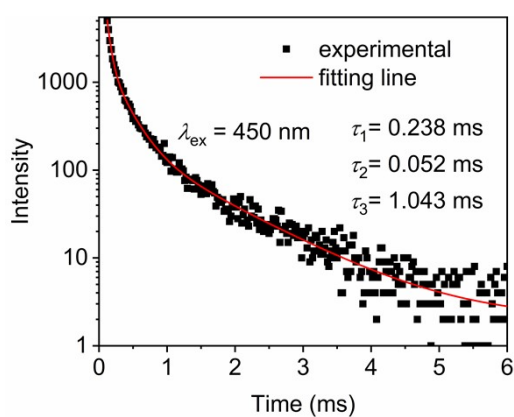

Fig. S7. Fitting results of the fluorescence decay curve for LGT:0.008Cr<sup>3+</sup> phosphors, monitoring 725 nm at room temperature.

$$I_t = I_0 + \sum_{i=1}^3 A_i \exp\left(-\frac{t}{\tau_i}\right)$$

The decay time is fitted well with the triple-exponential function  $I_t = I_0 + \sum_{i=1}^3 A_i \exp\left(-\frac{t}{\tau_i}\right)$ , where  $I_t$  relates to the luminescent intensity at time  $t$ ,  $I_0$  and  $A_i$  are constants,  $\tau_i$  is the lifetime of different emission centers.

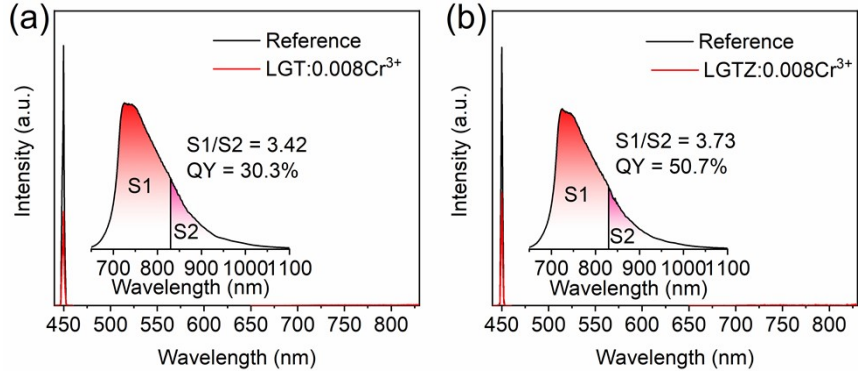

Fig. S8. QY of LGT:0.008Cr<sup>3+</sup> phosphors and LGTZ:0.008Cr<sup>3+</sup>.

The AE (absorption efficiency), IQE (internal quantum efficiency), and EQE (external quantum efficiency) can be obtained by the following equations:

$$IQE = \frac{\int L_s}{\int E_r - \int E_s} \#(S1)$$

$$AE = \frac{E_r - E_s}{E_r} \#(S2)$$

$$EQE = AE * IQE \#(S3)$$

Where  $L_s$  is the luminescence spectrum of the sample, and  $E_s$  and  $E_r$  are the excitation spectra with and without the sample in the integrating sphere, respectively. The QY here refers to the IQE defined in Eq. (S1).

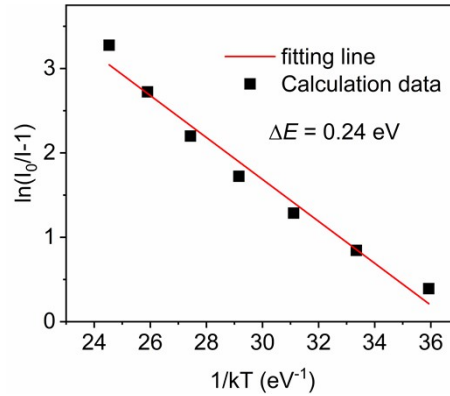

Fig. S9. The relationship between  $\ln(I_0/I-1)$  and  $1/kT$  of LGT:0.008Cr<sup>3+</sup>.

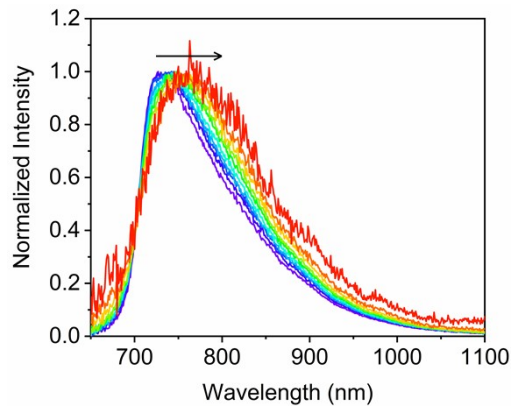

Fig. S10. Normalized temperature dependent PL spectra properties of LGTZ:0.008Cr<sup>3+</sup>.

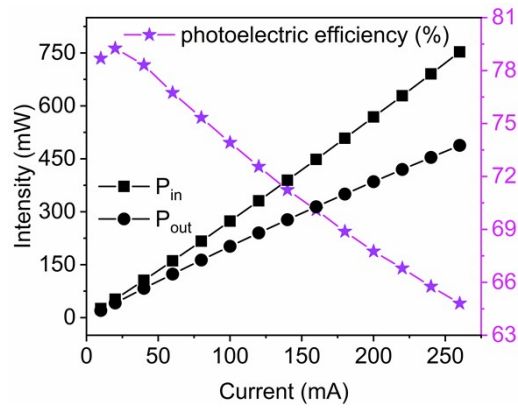

Fig. S11. The output power and photoelectric efficiency of 450 nm LED chip with input current.

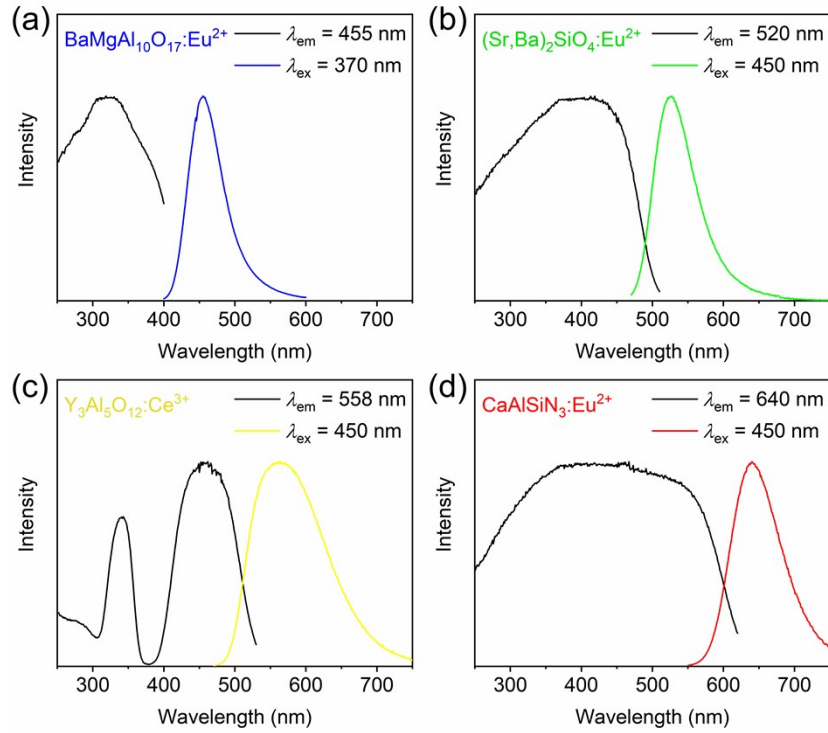

Fig. S12. PLE and PL spectra of commercial phosphors: (a)  $\text{BaMgAl}_{10}\text{O}_{17}:\text{Eu}^{2+}$ , (b)  $(\text{Sr,Ba})_2\text{SiO}_4:\text{Eu}^{2+}$ , (c)  $\text{Y}_3\text{Al}_5\text{O}_{12}:\text{Ce}^{3+}$ , and (d)  $\text{CaAlSiN}_3:\text{Eu}^{2+}$ .

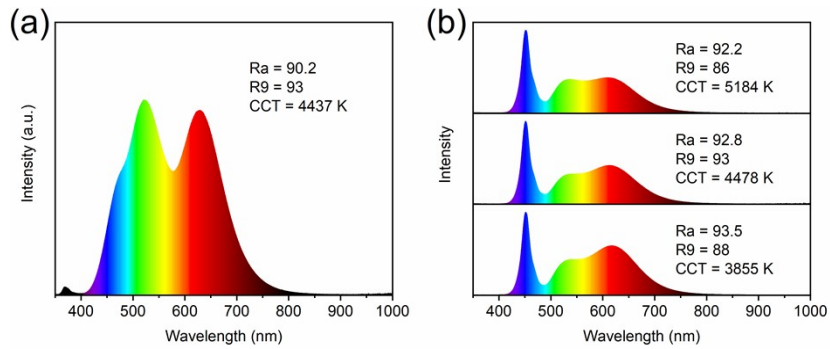

Fig. S13. (a) EL spectra of fabricated UV-pumped white pc-LED device utilizing blended RGB commercial phosphors. (b) EL spectra of fabricated blue-pumped white pc-LED device utilizing blended GYR commercial phosphors.

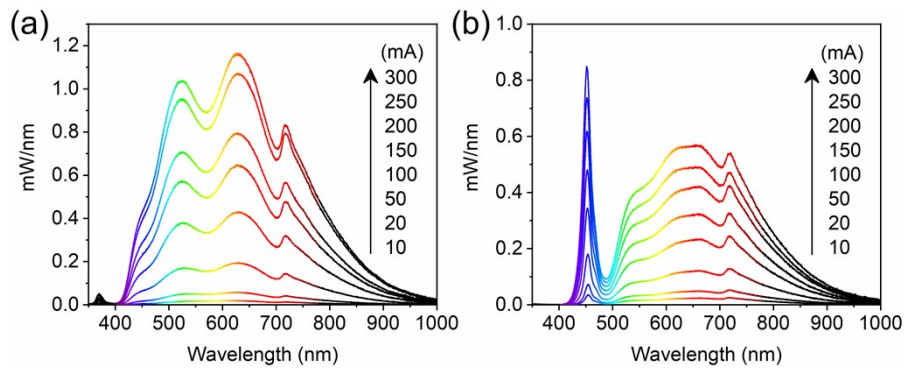

Fig. S14. (a) EL spectra of fabricated UV-based white pc-LED device at varied current over 10-300 mA. (b) EL spectra of fabricated blue-based white pc-LED device at varied current over 10-300 mA.

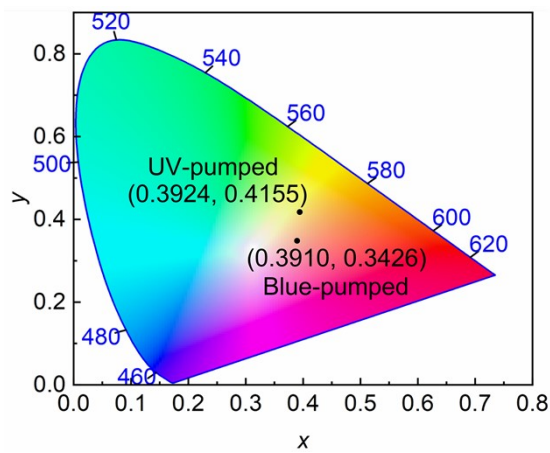

Fig. S15. CIE chromaticity coordinates of UV-pumped and blue-pumped white pc-LEDs.

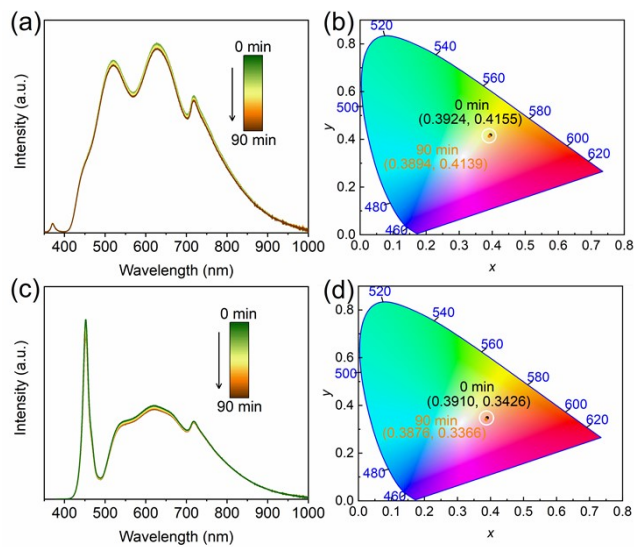

Fig. S16. (a) Photobleaching spectra and (b) CIE diagram of the UV-pumped white pc-LED recorded within 90 min of operation; (c) photobleaching spectra and (d) CIE diagram of the blue-pumped white pc-LED recorded within 90 min of operation.

Table S1. Lattice parameters and agreement factors for LiGaTiO<sub>4</sub>, LiGaTiO<sub>4</sub>:0.008Cr<sup>3+</sup>, LiGaTi<sub>0.99</sub>Zr<sub>0.01</sub>O<sub>4</sub>:0.008Cr<sup>3+</sup>, LiGaTi<sub>0.98</sub>Zr<sub>0.02</sub>O<sub>4</sub>:0.008Cr<sup>3+</sup> and LiGaTi<sub>0.97</sub>Zr<sub>0.03</sub>O<sub>4</sub>:0.008Cr<sup>3+</sup> refined by Rietveld method.

| Formula                  | LiGaTiO <sub>4</sub> | LiGaTiO <sub>4</sub> :0.008<br>Cr <sup>3+</sup> | LiGaTi <sub>0.99</sub> Zr <sub>0.01</sub><br>O <sub>4</sub> :0.008Cr <sup>3+</sup> | LiGaTi <sub>0.98</sub> Zr <sub>0.02</sub><br>O <sub>4</sub> :0.008Cr <sup>3+</sup> | LiGaTi <sub>0.97</sub> Zr <sub>0.03</sub><br>O <sub>4</sub> :0.008Cr <sup>3+</sup> |
|--------------------------|----------------------|-------------------------------------------------|------------------------------------------------------------------------------------|------------------------------------------------------------------------------------|------------------------------------------------------------------------------------|
| Crystal system           | Orthorhombic         | Orthorhombic                                    | Orthorhombic                                                                       | Orthorhombic                                                                       | Orthorhombic                                                                       |
| Space group              | Imma                 | Imma                                            | Imma                                                                               | Imma                                                                               | Imma                                                                               |
| a (Å)                    | 5.8736(4)            | 5.8702(4)                                       | 5.8732(5)                                                                          | 5.8743(4)                                                                          | 5.8734(5)                                                                          |
| b (Å)                    | 17.6020(12)          | 17.6024(12)                                     | 17.5986(14)                                                                        | 17.6030(12)                                                                        | 17.6051(14)                                                                        |
| c (Å)                    | 8.2917(6)            | 8.2913(6)                                       | 8.2935(7)                                                                          | 8.2938(6)                                                                          | 8.2979(7)                                                                          |
| α=β=γ (°)                | 90                   | 90                                              | 90                                                                                 | 90                                                                                 | 90                                                                                 |
| Z                        | 12                   | 12                                              | 12                                                                                 | 12                                                                                 | 12                                                                                 |
| Volume (Å <sup>3</sup> ) | 857.25(11)           | 856.74(10)                                      | 857.23(12)                                                                         | 857.62(10)                                                                         | 858.02(12)                                                                         |
| R <sub>p</sub>           | 8.38                 | 8.76                                            | 8.31                                                                               | 7.89                                                                               | 7.98                                                                               |
| R <sub>wp</sub>          | 11.35                | 12.22                                           | 11.39                                                                              | 10.81                                                                              | 10.87                                                                              |
| R <sub>exp</sub>         | 6.4                  | 5.92                                            | 6.38                                                                               | 6.32                                                                               | 6.50                                                                               |
| GOF                      | 1.77                 | 2.06                                            | 1.78                                                                               | 1.71                                                                               | 1.67                                                                               |

Table S2. Atomic positions and occupancies for LiGaTiO<sub>4</sub> refined by Rietveld method.

|     | Np | x       | y         | z       | Occupancy |
|-----|----|---------|-----------|---------|-----------|
| Ga1 | 8  | 0.00000 | 0.171(17) | 0.50000 | 0.25      |
| Ga2 | 8  | 0.25000 | 0.085(10) | 0.25000 | 0.25      |
| Ga3 | 8  | 0.00000 | 0.0834(7) | 0.87500 | 1.0       |
| Ti1 | 8  | 0.00000 | 0.173(9)  | 0.50000 | 0.75      |
| Ti2 | 8  | 0.25000 | 0.079(5)  | 0.25000 | 0.75      |
| Li1 | 4  | 0.00000 | 0.00000   | 0.50000 | 1.0       |
| Li2 | 4  | 0.25000 | 0.25000   | 0.75000 | 1.0       |
| Li3 | 4  | 0.75000 | 0.25000   | 0.75000 | 1.0       |
| O1  | 16 | 0.24000 | 0.40000   | 0.00000 | 1.0       |
| O2  | 8  | 0.00000 | 0.00000   | 0.25000 | 1.0       |

|    |   |         |          |         |     |
|----|---|---------|----------|---------|-----|
| O3 | 8 | 0.00000 | 0.150(2) | 0.25000 | 1.0 |
| O4 | 8 | 0.00000 | 0.167(2) | 0.75000 | 1.0 |
| O5 | 8 | 0.25000 | 0.25000  | 0.00000 | 1.0 |

Table S3. Atomic positions and occupancies for  $\text{LiGaTiO}_4:0.008\text{Cr}^{3+}$  refined by Rietveld method.

|     | Np | <i>x</i> | <i>y</i>   | <i>z</i> | Occupancy |
|-----|----|----------|------------|----------|-----------|
| Ga1 | 8  | 0.00000  | 0.17(2)    | 0.50000  | 0.249(8)  |
| Cr1 |    | 0.00000  | 0.17(2)    | 0.50000  | 0.001(8)  |
| Ga2 | 8  | 0.25000  | 0.062(2)   | 0.25000  | 0.243(8)  |
| Cr2 |    | 0.25000  | 0.062(2)   | 0.25000  | 0.007(8)  |
| Ga3 | 8  | 0.00000  | 0.0860(6)  | 0.87500  | 1.0       |
| Ti1 | 8  | 0.00000  | 0.171(11)  | 0.50000  | 0.75      |
| Ti2 | 8  | 0.25000  | 0.0870(12) | 0.25000  | 0.75      |
| Li1 | 4  | 0.00000  | 0.00000    | 0.50000  | 1.0       |
| Li2 | 4  | 0.25000  | 0.25000    | 0.75000  | 1.0       |
| Li3 | 4  | 0.75000  | 0.25000    | 0.75000  | 1.0       |
| O1  | 16 | 0.24000  | 0.40000    | 0.00000  | 1.0       |
| O2  | 8  | 0.00000  | 0.00000    | 0.25000  | 1.0       |
| O3  | 8  | 0.00000  | 0.147(3)   | 0.25000  | 1.0       |
| O4  | 8  | 0.00000  | 0.168(2)   | 0.75000  | 1.0       |
| O5  | 8  | 0.25000  | 0.25000    | 0.00000  | 1.0       |

Table S4. Atomic positions and occupancies for  $\text{LiGaTi}_{0.99}\text{Zr}_{0.01}\text{O}_4:0.008\text{Cr}^{3+}$  refined by Rietveld method.

|  | Np | <i>x</i> | <i>y</i> | <i>z</i> | Occupancy |
|--|----|----------|----------|----------|-----------|
|--|----|----------|----------|----------|-----------|

|     |    |         |           |         |         |
|-----|----|---------|-----------|---------|---------|
| Ga1 | 8  | 0.00000 | 0.170(2)  | 0.50000 | 0.25    |
| Ga2 | 8  | 0.25000 | 0.084(12) | 0.25000 | 0.25    |
| Ga3 | 8  | 0.00000 | 0.0824(8) | 0.87500 | 1.0     |
| Ti1 | 8  | 0.00000 | 0.173(12) | 0.50000 | 0.74(2) |
| Zr1 |    | 0.00000 | 0.173(12) | 0.50000 | 0.01(2) |
| Ti2 | 8  | 0.25000 | 0.079(7)  | 0.25000 | 0.74(2) |
| Zr2 |    | 0.25000 | 0.079(7)  | 0.25000 | 0.00(2) |
| Li1 | 4  | 0.00000 | 0.00000   | 0.50000 | 1.0     |
| Li2 | 4  | 0.25000 | 0.25000   | 0.75000 | 1.0     |
| Li3 | 4  | 0.75000 | 0.25000   | 0.75000 | 1.0     |
| O1  | 16 | 0.24000 | 0.40000   | 0.00000 | 1.0     |
| O2  | 8  | 0.00000 | 0.00000   | 0.25000 | 1.0     |
| O3  | 8  | 0.00000 | 0.151(3)  | 0.25000 | 1.0     |
| O4  | 8  | 0.00000 | 0.165(3)  | 0.75000 | 1.0     |
| O5  | 8  | 0.25000 | 0.25000   | 0.00000 | 1.0     |

Table S5. Atomic positions and occupancies for  $\text{LiGaTi}_{0.98}\text{Zr}_{0.02}\text{O}_4:0.008\text{Cr}^{3+}$  refined by Rietveld method.

|     | Np | x       | y         | z       | Occupancy |
|-----|----|---------|-----------|---------|-----------|
| Ga1 | 8  | 0.00000 | 0.169(12) | 0.50000 | 0.25      |
| Ga2 | 8  | 0.25000 | 0.088(5)  | 0.25000 | 0.25      |
| Ga3 | 8  | 0.00000 | 0.0822(7) | 0.87500 | 1.0       |
| Ti1 | 8  | 0.00000 | 0.173(6)  | 0.50000 | 0.73(19)  |
| Zr1 |    | 0.00000 | 0.173(6)  | 0.50000 | 0.02(19)  |
| Ti2 | 8  | 0.25000 | 0.079(7)  | 0.25000 | 0.75(19)  |
| Zr2 |    | 0.25000 | 0.079(7)  | 0.25000 | 0.00(19)  |

|     |    |         |          |         |     |
|-----|----|---------|----------|---------|-----|
| Li1 | 4  | 0.00000 | 0.00000  | 0.50000 | 1.0 |
| Li2 | 4  | 0.25000 | 0.25000  | 0.75000 | 1.0 |
| Li3 | 4  | 0.75000 | 0.25000  | 0.75000 | 1.0 |
| O1  | 16 | 0.24000 | 0.40000  | 0.00000 | 1.0 |
| O2  | 8  | 0.00000 | 0.00000  | 0.25000 | 1.0 |
| O3  | 8  | 0.00000 | 0.151(3) | 0.25000 | 1.0 |
| O4  | 8  | 0.00000 | 0.164(3) | 0.75000 | 1.0 |
| O5  | 8  | 0.25000 | 0.25000  | 0.00000 | 1.0 |

Table S6. Atomic positions and occupancies for  $\text{LiGaTi}_{0.97}\text{Zr}_{0.03}\text{O}_4:0.008\text{Cr}^{3+}$  refined by Rietveld method.

|     | Np | <i>x</i> | <i>y</i>   | <i>z</i> | Occupancy |
|-----|----|----------|------------|----------|-----------|
| Ga1 | 8  | 0.00000  | 0.165(3)   | 0.50000  | 0.25      |
| Ga2 | 8  | 0.25000  | 0.08(4)    | 0.25000  | 0.25      |
| Ga3 | 8  | 0.00000  | 0.0805(6)  | 0.87500  | 1.0       |
| Ti1 | 8  | 0.00000  | 0.1801(16) | 0.50000  | 0.725(2)  |
| Zr1 |    | 0.00000  | 0.1801(16) | 0.50000  | 0.025(2)  |
| Ti2 | 8  | 0.25000  | 0.08(2)    | 0.25000  | 0.745(2)  |
| Zr2 |    | 0.25000  | 0.08(2)    | 0.25000  | 0.005(2)  |
| Li1 | 4  | 0.00000  | 0.00000    | 0.50000  | 1.0       |
| Li2 | 4  | 0.25000  | 0.25000    | 0.75000  | 1.0       |
| Li3 | 4  | 0.75000  | 0.25000    | 0.75000  | 1.0       |
| O1  | 16 | 0.24000  | 0.40000    | 0.00000  | 1.0       |
| O2  | 8  | 0.00000  | 0.00000    | 0.25000  | 1.0       |
| O3  | 8  | 0.00000  | 0.147(3)   | 0.25000  | 1.0       |
| O4  | 8  | 0.00000  | 0.162(3)   | 0.75000  | 1.0       |

|    |   |         |         |         |     |
|----|---|---------|---------|---------|-----|
| O5 | 8 | 0.25000 | 0.25000 | 0.00000 | 1.0 |
|----|---|---------|---------|---------|-----|

Table S7. The calculated distortion index  $D$  and the variance  $\sigma^2$ .

|       |              | 0        | 0.03     |
|-------|--------------|----------|----------|
| Ga1-O | $d_{av}$     | 2.02855  | 2.03034  |
|       | $D_1$        | 0.02005  | 0.03913  |
|       | $\sigma^2_1$ | 39.40317 | 46.16915 |
| Ga2-O | $d_{av}$     | 2.01518  | 2.00799  |
|       | $D_2$        | 0.04637  | 0.05069  |
|       | $\sigma^2_2$ | 44.85236 | 52.56347 |

Table S8. The CIE chromaticity coordinates and color purity of the NIR pc-LED under different driving currents.

| Current (mA) | Voltage (V) | Power (mW) | T (°C) | CIE (x, y)       | Color purity (%) |
|--------------|-------------|------------|--------|------------------|------------------|
| 10           | 2.556       | 25.56      | 24.6   | (0.7331, 0.2669) | 89.5             |
| 20           | 2.587       | 51.74      | 25.1   | (0.7329, 0.2671) | 94.2             |
| 50           | 2.644       | 132.2      | 26.6   | (0.7328, 0.2672) | 94.3             |
| 100          | 2.712       | 271.2      | 28.2   | (0.7328, 0.2672) | 94.6             |
| 150          | 2.77        | 415.5      | 31.3   | (0.7328, 0.2672) | 94.6             |
| 200          | 2.825       | 565        | 35.4   | (0.7328, 0.2672) | 94.6             |
| 250          | 2.875       | 718.75     | 37.9   | (0.7328, 0.2672) | 94.3             |
| 300          | 2.923       | 876.9      | 41.7   | (0.7328, 0.2672) | 94.5             |
